# Supplementary material for: First example of a tetra-carboxylate bridged dimanganese speciesElectronic supplementary information (ESI) available: experimental section and computational details. See http://www.rsc.org/suppdata/cc/b2/b211886f/
Source: Royal Society of Chemistry journal article supplement (doi:10.1039/b211886f), 2003-01-23
Supplement: esi.doc [file esi.doc]

## **Electronic supplementary information (ESI)**

## **First example of a tetra-carboxylate bridged dimanganese species**

Abdessamad Grirrane,a Antonio Pastor,a Agustín Galindo,*a Andrea Ienco,b Carlo Mealli*b and Patrick Rosac

a Departamento de Química Inorgánica, Universidad de Sevilla, Aptdo 553, 41071 Sevilla, Spain,

b ICCOM, CNR, Via Nardi 39, 50132 Firenze, Italy

c Dipartimento di Chimica, Via della Lastruccia 3, 50019 Sesto Fiorentino (Firenze), Italy

# Experimental

All preparations and other operations were carried out under aerobic conditions. Microanalyses (C, H, N) were carried out by the Microanalytical Service of the Instituto de Investigaciones Químicas (CSIC). Infrared spectra were recorded on Perkin-Elmer Model 883 spectrophotometer (Nujol emulsion in NaCl plates). Magnetic moments at room temperature were measured in the solid state with a Sherwood Scientific (Cambridge Research Laboratory) magnetic balance. Thiodiacetic acid and other chemicals were obtained from commercial sources and were used without further purification.

### Synthesis

*Synthesis of* **1**: To a solution of S(CH2COOH)2 (0.30 g, 2 mmol) in water (20 mL) was added Na2CO3 (0.21 g, 2 mmol). The mixture was stirred until the evolution of CO2 ceased and then added onto a solution of MnCl2·4H2O (0.30 g, 2 mmol) in water (15 mL). The resulting mixture was stirred for 10 minutes. Then, acetone was added and the solution was kept at room temperature overnight. Colourless crystals of **1** were formed, filtered off, washed with water, acetone and Et2O and air dried (0.30 g, 68%). IR (NaCl, cm-1): 3530-3051 br (OH), 1591 s (COO asymm).  = 5.6 B at 23ºC. Anal Calcd for C4H6MnO5S: C, 21.72; H, 2.71. Found: C, 21.44; H, 2.91%.

*Synthesis of* **2**: Bipy (0.08 g, 0.5 mmol) was added to a solution containing **1** (0.11 g, 0.5 mmol) in 15 mL of hot water. The resulting mixture was stirred at reflux until a clear yellow solution was obtained. Compound **2** crystallized upon evaporation of the solvent at room temperature after a few days. Yellow crystals were filtered off, washed with cold water and Et2O and dried in air (0.15 g, 84%). Re-crystallization of the product in water results in the formation of yellow crystals suitable for an X-ray study. IR (NaCl, cm-1): 3098, 3062 w (CH, bipy), 1594 s (COO asymm).  = 5.6 B at 23 ºC. Anal Calcd for C14H12MnN2O4S: C, 46.76; H, 3.34; N, 7.79. Found: C, 46.74; H, 3.33; N, 8.01%.

### Magnetic studies

The temperature dependence of the magnetic susceptibility was measured on a Cryogenics S600 SQUID magnetometer in the temperature range of 300-1.8 K with an applied field of 1 T. Diamagnetic corrections1 of the constituent atoms were estimated from Pascal constants -181·10-6 emu mol-1 G-1.

**Computational details**

A single point unrestricted HF calculation (LANL2DZ basis set2) for the dimeric model complex Mn2(‑OOCH)4(bipy)2 was carried out by using the Gaussian 98 suite of programs.3

__________________

1 C. J. O'Connor, in *Magnetochemistry - Advances in Theory and Experimentation*, *Progr. Inorg. Chem.*, 1982, **29**, 203.

2 (a) T. H. Dunning, Jr., P. J. Hay, *Modern Theoretical Chemistry*, Plenum, New York, 1976, p. 1. (b) P. J. Hay, W. R. Wadt, *J. Chem. Phys.* 1985, **82**, 299.

3 Gaussian 98, Revision A.7, M. J. Frisch, G. W. Trucks, H. B. Schlegel, G. E. Scuseria, M. A. Robb, J. R. Cheeseman, V. G. Zakrzewski, J. A. Montgomery, Jr., R. E. Stratmann, J. C. Burant, S. Dapprich, J. M. Millam, A. D. Daniels, K. N. Kudin, M. C. Strain, O. Farkas, J. Tomasi, V. Barone, M. Cossi, R. Cammi, B. Mennucci, C. Pomelli, C. Adamo, S. Clifford, J. Ochterski, G. A. Petersson, P. Y. Ayala, Q. Cui, K. Morokuma, D. K. Malick, A. D. Rabuck, K. Raghavachari, J. B. Foresman, J. Cioslowski, J. V. Ortiz, A. G. Baboul, B. B. Stefanov, G. Liu, A. Liashenko, P. Piskorz, I. Komaromi, R. Gomperts, R. L. Martin, D. J. Fox, T. Keith, M. A. Al-Laham, C. Y. Peng, A. Nanayakkara, C. Gonzalez, M. Challacombe, P. M. W. Gill, B. Johnson, W. Chen, M. W. Wong, J. L. Andres, M. Head-Gordon, E. S. Replogle, J. A. Pople, Gaussian, Inc., Pittsburgh PA, 1998.
